# Supplementary material for: Genetic variations and dog breed identification using inter-simple sequence repeat markers coupled with high resolution melting analysis
Source: PeerJ. 2020 Oct 30;8:e10215. doi: 10.7717/peerj.10215 (PMC7605226; doi:10.7717/peerj.10215)
Supplement: Supplemental Information 1 — Information of 2 bands for genetic variation and differentiation analysis among different dog breeds and also dog breed population structure and phylogenetic dendrograms were presented in each 10 ISSR primer, UBC809, UBC817, UBC818, UBC823, UBC825, UBC826, UBC827, UBC835, UBC844 and UBC848 as base pair. [file peerj-08-10215-s001.xlsx]

## Sheet: Sheet1
Raw data showed number of samples, name of different dog breeds with abbreviation indicated as "Pop".
Information of 2 bands for genetic variation and differentiation analysis among different dog breeds and also dog breed population structure and phylogenetic dendrograms were presented in each 10 ISSR primers,UBC809, UBC817, UBC818, UBC823, UBC825, UBC826, UBC827, UBC835,UBC844 and UBC848 as base pair.
Number of samples	Sample	Pop	Breeds	UBC809		UBC817		UBC818		UBC823		UBC825		UBC826		UBC827		UBC835		UBC844		UBC848
				Band 1 (bp)	Band 2 (bp)	Band 1 (bp)	Band 2 (bp)	Band 1 (bp)	Band 2 (bp)	Band 1 (bp)	Band 2 (bp)	Band 1 (bp)	Band 2 (bp)	Band 1 (bp)	Band 2 (bp)	Band 1 (bp)	Band 2 (bp)	Band 1 (bp)	Band 2 (bp)	Band 1 (bp)	Band 2 (bp)	Band 1 (bp)	Band 2 (bp)
1	2	CHI	Chihuahua	1120	450	1000	310	1180	570	950	580	1300	400	1350	580	1150	520	1180	490	1040	450	1200	470
2	3	CHI	Chihuahua	1000	580	980	280	1000	360	850	600	1050	360	1230	500	1110	380	1080	360	810	550	1250	400
3	4	CHI	Chihuahua	900	390	900	340	990	310	800	510	850	470	1150	390	1020	480	900	410	900	380	1010	490
4	5	CHI	Chihuahua	700	600	1100	360	800	490	1040	700	1110	650	1100	700	900	600	1130	300	1170	480	1080	560
5	6	CHI	Chihuahua	750	500	850	400	840	450	700	510	1190	1050	1050	640	1210	700	790	280	1230	680	850	600
6	8	CHI	Chihuahua	1120	630	800	430	760	650	1040	800	750	720	950	800	800	780	280	260	1270	710	1100	650
7	9	CHI	Chihuahua	630	600	770	700	880	310	800	600	1100	550	1600	950	1110	480	820	690	1210	600	920	790
8	11	CHI	Chihuahua	800	450	680	500	310	280	700	600	1010	950	1010	850	1150	1110	790	260	1350	680	850	800
9	13	CHI	Chihuahua	1200	1000	600	540	1060	1000	1110	1040	720	510	1450	1010	1210	1150	690	600	1170	700	850	790
10	14	CHI	Chihuahua	1000	390	540	340	720	620	850	800	950	580	850	470	1110	1020	750	300	1140	900	920	800
11	15	CHI	Chihuahua	750	700	700	680	650	520	1110	510	1210	1190	800	580	1020	900	1130	1080	900	480	1250	1080
12	16	CHI	Chihuahua	800	750	1000	980	520	360	1040	600	1190	700	1350	550	900	590	1080	950	600	480	1250	1200
13	17	CHI	Chihuahua	1200	1120	980	900	650	360	850	700	650	500	550	470	520	380	950	820	600	500	1010	850
14	18	CHI	Chihuahua	1080	900	900	850	650	520	950	700	510	470	1350	500	900	800	490	410	1230	1140	1010	920
15	19	CHI	Chihuahua	1120	1080	850	800	520	360	700	600	470	400	640	580	800	780	1000	900	1170	1110	1190	400
16	20	CHI	Chihuahua	900	800	800	770	650	360	1040	950	950	850	1230	1150	780	600	1000	750	1040	810	490	450
17	21	CHI	Chihuahua	390	310	770	700	650	520	880	680	1150	1100	1100	1050	1600	520	900	360	1040	500	1080	560
18	22	CHI	Chihuahua	450	310	700	680	520	360	1090	1020	580	520	1150	1100	1350	380	820	280	950	450	1130	600
19	23	CHI	Chihuahua	580	500	680	600	650	360	1020	580	1260	1210	550	470	1400	1350	720	470	900	480	1200	450
20	24	CHI	Chihuahua	750	600	600	540	650	520	910	700	1700	1450	1050	1010	1210	480	750	560	810	550	1280	1250
21	25	CHI	Chihuahua	1000	580	540	460	520	360	1020	880	1600	1150	1010	950	1110	1090	600	490	1350	1270	450	430
22	26	CHI	Chihuahua	630	450	540	500	650	360	1220	910	1300	1100	750	550	1020	620	1080	1020	1170	1110	1280	380
23	27	CHI	Chihuahua	800	600	460	430	650	520	1700	1260	1600	1300	800	700	1500	780	1020	950	1270	1170	1200	490
24	28	CHI	Chihuahua	1200	500	500	460	1000	450	700	600	720	360	1100	800	800	780	890	720	1040	0	990	560
25	29	CHI	Chihuahua	1080	700	430	400	520	360	1700	1600	1700	1600	1230	1010	1090	550	490	470	480	450	1080	990
26	30	CHI	Chihuahua	400	390	400	360	1060	910	1600	1350	1210	570	900	800	1600	1210	900	890	600	480	1350	1280
27	31	CHI	Chihuahua	700	400	360	310	1130	570	1350	1180	1300	1260	750	700	1350	800	500	400	700	600	1500	1350
28	32	CHI	Chihuahua	900	400	850	340	760	650	1530	1500	1450	850	900	700	1110	1020	520	380	810	700	1190	1010
29	33	CHI	Chihuahua	750	580	1100	1000	1180	1060	1150	1090	520	500	1230	1100	1090	900	850	750	900	810	1280	600
30	34	CHI	Chihuahua	1000	750	800	700	810	760	1260	800	1260	650	1150	900	1600	1500	1130	1000	1040	900	920	730
31	35	CHI	Chihuahua	1120	900	900	540	910	570	1150	1020	1150	1010	1050	900	900	590	820	520	700	680	800	560
32	36	CHI	Chihuahua	450	390	680	360	700	650	700	600	1600	1450	800	700	1350	1190	1000	790	680	600	820	730
33	37	CHI	Chihuahua	800	630	980	400	1210	1180	680	580	750	570	1010	950	550	480	520	490	800	710	1190	450
34	38	CHI	Chihuahua	580	500	700	310	1130	1020	910	510	650	400	750	700	480	400	820	410	580	520	850	400
35	39	CHI	Chihuahua	390	350	600	500	880	620	700	680	800	700	800	750	1190	550	1080	750	1170	1110	1130	490
36	40	CHI	Chihuahua	630	600	360	340	1180	1130	1110	910	700	510	1100	1050	620	550	1220	1180	1230	1210	1310	530
37	41	CHI	Chihuahua	350	310	900	430	1000	700	600	510	510	470	1010	900	590	480	1180	1020	230	210	1050	300
38	42	CHI	Chihuahua	800	700	430	280	1020	410	700	510	750	650	1050	800	400	330	230	220	950	250	820	320
39	43	CHI	Chihuahua	1080	1000	540	430	620	450	1110	910	1100	850	900	750	900	620	1380	1250	1020	230	1310	800
40	44	CHI	Chihuahua	500	350	310	280	650	0	910	700	470	400	600	500	1350	1250	890	820	450	210	490	450
41	45	CHI	Chihuahua	390	310	770	540	720	600	800	680	850	750	640	600	420	330	650	520	700	600	330	270
42	51	CHI	Chihuahua	750	630	460	360	1210	720	1220	1110	1700	510	700	640	1400	400	1000	650	880	800	1050	820
43	107	CHI	Chihuahua	900	450	850	680	910	840	1700	580	510	400	950	640	1210	620	1130	470	680	260	700	530
44	108	CHI	Chihuahua	0	0	1000	850	840	650	1090	1040	1010	550	1100	950	1250	550	720	380	260	250	920	650
45	134	CHI	Chihuahua	1000	600	800	680	1130	600	1040	800	550	470	950	830	1350	480	890	320	880	680	560	490
46	170	CHI	Chihuahua	600	450	680	600	1210	1130	800	680	700	570	830	600	1600	420	650	300	800	600	850	790
47	1	ALAS	Alaskan Malamute	920	890	1110	780	1100	550	1120	700	1210	1010	1350	700	1400	1010	1450	1250	1010	750	1150	990
48	2	ALAS	Alaskan Malamute	990	400	690	590	850	700	1050	750	1120	820	1100	800	1180	520	800	380	1200	600	900	410
49	1	DACH	Dachshund	420	380	1080	330	1100	800	1240	480	1210	370	1040	690	1090	450	1280	630	1000	700	700	350
50	2	DACH	Dachshund	1210	600	1220	370	1400	850	800	580	900	560	1070	730	1040	500	1370	400	1050	530	1170	580
51	3	DACH	Dachshund	990	400	1450	830	1070	680	1050	750	1500	820	800	650	1400	1000	750	560	1200	650	1080	990
52	1	DAL	Dalmatian	1300	900	1220	520	1400	720	1260	350	1380	490	900	450	820	380	1450	800	750	400	1380	380
53	2	DAL	Dalmatian	1140	650	11160	290	920	500	750	580	1080	710	1010	650	1180	800	750	560	950	650	1280	950
54	3	DAL	Dalmatian	450	270	780	480	1070	450	1010	700	1120	500	950	800	1010	520	600	450	1130	550	1250	580
55	1	JACK	Jack Russell Terrier	1180	340	1020	350	1120	520	850	500	700	340	1030	500	1040	380	1010	330	1070	470	1350	540
56	2	JACK	Jack Russell Terrier	1170	450	1110	400	1150	580	800	600	540	320	900	600	900	490	900	400	1040	500	1250	390
57	4	JACK	Jack Russell Terrier	1120	420	1200	450	1400	650	950	700	800	360	1110	640	800	500	1050	440	1000	550	1050	490
58	7	JACK	Jack Russell Terrier	1050	490	1350	420	1350	700	750	500	750	400	800	700	890	600	1150	480	990	650	1000	430
59	8	JACK	Jack Russell Terrier	900	530	1050	290	1300	400	1000	950	600	410	1160	1090	1350	660	1070	550	1290	700	850	620
60	9	JACK	Jack Russell Terrier	850	550	800	310	1200	410	500	420	1020	450	600	500	1190	750	1120	620	1220	750	680	400
61	11	JACK	Jack Russell Terrier	820	630	1150	330	1100	550	600	420	1130	510	1030	900	1210	850	950	640	1130	820	1180	780
62	3	JACK	Jack Russell Terrier	1290	700	1270	600	1080	680	1350	800	1250	900	1280	340	1100	420	1350	370	1350	390	950	310
63	5	JACK	Jack Russell Terrier	1200	720	1180	850	800	710	1140	1080	1170	1050	1220	380	1120	620	1250	450	1250	480	1260	360
64	6	JACK	Jack Russell Terrier	1350	1000	950	700	950	900	1160	1010	1190	950	1050	450	1300	1050	1160	580	1180	1120	800	380
65	2	PUG	Pug	1240	400	1200	490	1450	410	1250	1180	720	270	1170	450	1400	350	800	380	480	420	1350	370
66	3	PUG	Pug	1200	450	1040	390	1270	470	900	450	990	320	1190	490	950	420	1120	680	1250	1000	1240	1170
67	4	PUG	Pug	1130	490	900	400	1230	550	830	520	850	380	1250	580	1030	510	1080	470	750	400	1120	400
68	5	PUG	Pug	1110	560	850	420	1210	600	800	620	750	410	1350	750	1100	900	1350	450	650	450	1200	600
69	6	PUG	Pug	1220	680	750	470	1380	650	1100	800	700	450	1270	650	1120	500	1220	700	1120	500	1050	980
70	7	PUG	Pug	1030	720	1080	540	1350	800	1050	750	1150	520	1450	700	1150	600	1290	330	1090	600	950	720
71	8	PUG	Pug	950	820	540	390	1280	860	750	450	1050	600	1210	800	1250	650	900	400	800	700	820	450
72	10	PUG	Pug	850	790	470	400	1140	1020	1130	650	600	320	1100	900	1030	750	750	500	650	550	1260	550
73	11	PUG	Pug	820	470	1120	750	1130	950	1210	900	1120	990	380	350	1320	850	650	600	1030	490	1450	680
74	1	PUG	Pug	1260	850	1130	600	1160	1050	620	520	1200	1050	950	420	1230	700	1010	680	550	450	790	470
75	9	PUG	Pug	1320	1060	1250	800	1080	690	650	620	1220	850	1050	1020	1300	820	1150	1010	850	750	800	680
76	3	LAB	Labrador Retriever	1110	400	420	410	1450	390	980	550	990	300	1100	350	1150	1030	1350	280	1120	400	1450	330
77	4	LAB	Labrador Retriever	1260	490	1320	1200	1350	370	750	620	1020	320	800	400	1190	900	1010	380	1090	360	1350	380
78	5	LAB	Labrador Retriever	1090	600	1300	1090	1300	410	650	600	850	180	1090	490	1120	290	1120	400	820	620	280	220
79	6	LAB	Labrador Retriever	1050	650	750	580	1270	470	700	490	750	230	340	320	950	350	1080	450	850	450	270	240
80	7	LAB	Labrador Retriever	820	680	1220	800	1230	450	1330	1020	1090	380	1110	450	1250	480	1290	680	650	420	1280	1200
81	10	LAB	Labrador Retriever	1030	470	1250	490	1210	490	1280	1130	720	400	1020	520	1230	500	1220	500	1120	480	1240	350
82	11	LAB	Labrador Retriever	1240	450	1200	610	1160	550	980	650	600	500	950	600	1010	540	900	510	490	450	1170	390
83	12	LAB	Labrador Retriever	1220	590	1350	1280	1100	650	1050	980	520	300	900	650	800	600	800	600	480	420	950	880
84	15	LAB	Labrador Retriever	1130	700	1450	390	1080	600	1020	750	500	410	1350	800	1300	610	750	680	1090	850	1120	420
85	16	LAB	Labrador Retriever	950	900	1170	400	1020	700	1250	1210	400	320	850	750	1400	690	1190	700	850	650	1050	500
86	1	LAB	Labrador Retriever	1390	850	1130	470	1380	690	1180	450	1260	450	1450	700	1320	420	680	470	1190	550	1020	530
87	14	LAB	Labrador Retriever	1280	380	1120	540	1130	980	900	500	1350	520	1050	900	1070	700	1150	650	1250	1030	1400	820
88	9	LAB	Labrador Retriever	1200	820	1040	850	1280	860	800	520	1150	700	1270	580	820	800	500	330	1000	750	790	600
89	13	LAB	Labrador Retriever	1320	1180	1280	1040	1140	1050	1130	900	950	900	1210	1190	1030	750	650	600	950	800	1260	900
90	1	GER	German Shepherd	1240	590	1130	390	1450	550	900	520	700	320	1350	490	1250	350	1220	350	1120	420	1170	470
91	2	GER	German Shepherd	1220	680	1120	400	1350	650	800	620	990	380	1210	650	1120	480	1120	400	1090	480	1120	550
92	8	GER	German Shepherd	1320	720	1040	410	1140	600	620	500	850	350	950	500	1000	500	1080	330	950	650	1020	680
93	9	GER	German Shepherd	1200	790	1080	350	1230	690	500	450	600	400	1170	700	1070	1030	1350	450	850	480	1280	650
94	10	GER	German Shepherd	1180	800	950	800	1300	470	800	520	1090	410	1190	800	1110	750	900	500	1120	1090	1350	720
95	13	GER	German Shepherd	1130	400	1090	470	1210	490	620	520	1020	520	1100	600	1230	600	1290	600	1090	850	1240	800
96	14	GER	German Shepherd	1110	490	1280	420	1160	450	800	620	1180	450	1110	850	1400	690	1010	750	650	420	1050	530
97	15	GER	German Shepherd	1280	470	1250	540	1100	390	1180	550	1050	600	1020	900	1150	550	800	280	1280	1250	1450	790
98	16	GER	German Shepherd	1450	450	1200	580	1080	410	830	490	1120	700	950	520	1300	700	700	680	1250	450	980	590
99	19	GER	German Shepherd	1390	700	1320	610	1020	700	1280	600	900	720	900	650	1100	540	650	350	480	420	1200	510
100	20	GER	German Shepherd	1050	820	1300	790	950	750	1330	1020	700	300	1250	1020	1010	800	1220	1120	1280	650	880	380
101	21	GER	German Shepherd	1090	850	1450	800	1270	800	1250	900	1090	1020	1350	1100	1320	1190	1080	1010	1250	850	790	390
102	22	GER	German Shepherd	1030	950	1350	630	860	410	1180	700	1180	250	1090	1000	1000	900	900	800	1090	480	1260	370
103	4	GER	German Shepherd	1390	1030	1220	750	1380	980	1210	650	1350	500	1450	350	1030	950	1220	330	1120	450	1400	400
104	5	GER	German Shepherd	1240	1110	950	850	1130	860	1130	750	1220	750	1350	380	1120	1070	1350	400	1030	500	900	450
105	6	GER	German Shepherd	395	380	750	390	1050	370	1100	830	1260	270	1270	400	950	420	1150	500	1090	1000	950	900
106	11	GER	German Shepherd	1320	1200	800	400	650	550	1050	450	500	410	1210	420	500	350	1120	470	1000	600	680	420
107	12	GER	German Shepherd	850	820	1220	1130	1450	470	900	800	600	270	1190	290	390	340	1080	550	800	700	820	470
108	17	GER	German Shepherd	450	395	1300	1250	1380	600	830	750	1350	1220	1250	270	820	370	1290	600	1190	1090	1450	1350
109	18	GER	German Shepherd	490	450	600	470	1350	1130	1180	1100	1220	1150	1020	800	600	390	900	650	450	400	1260	1240
110	23	GER	German Shepherd	790	720	1130	1080	1270	1020	1130	900	1120	1050	1170	950	1250	1230	1010	750	650	550	1200	1120
111	3	GER	German Shepherd	1200	1060	1120	1040	1280	1210	1050	600	990	950	900	700	900	850	700	470	1000	490	1020	900
112	1	SHI	Shiba Inu	1350	550	1190	700	1200	800	900	620	1250	350	1120	1100	810	580	1080	400	1010	520	680	470
113	1	PAP	Papillon	1150	980	1220	370	820	750	990	680	800	400	1100	470	1300	1160	1240	800	1000	980	1400	1000
114	5	BK	Thai Bangkaew	1280	370	1200	350	1350	450	1120	350	1170	350	1210	280	1250	320	1180	330	1010	470	1070	220
115	6	BK	Thai Bangkaew	1350	390	1150	380	1260	400	1180	370	1100	390	1190	350	1180	350	1120	280	900	490	1000	300
116	7	BK	Thai Bangkaew	1250	320	1100	390	1220	350	1020	390	1050	420	1110	400	1120	380	1100	300	800	520	850	350
117	8	BK	Thai Bangkaew	1210	420	1300	410	1120	530	1220	450	900	450	1100	480	1100	400	1350	380	700	580	1320	550
118	14	BK	Thai Bangkaew	1120	450	1000	550	1300	550	1000	480	1000	500	1230	500	1110	500	1300	400	620	520	1250	470
119	16	BK	Thai Bangkaew	1150	500	900	600	1110	610	1380	520	850	550	1200	550	1000	550	1150	450	520	420	1300	500
120	17	BK	Thai Bangkaew	1030	550	1250	650	1280	700	1050	620	950	600	1050	600	900	600	1080	490	900	800	1350	480
121	18	BK	Thai Bangkaew	900	600	1150	700	1180	720	1020	500	1020	650	1000	700	810	660	1010	500	800	700	1180	590
122	20	BK	Thai Bangkaew	950	610	700	390	1050	790	800	750	750	350	950	780	800	700	900	510	620	580	1150	400
123	21	BK	Thai Bangkaew	880	650	800	380	1090	600	700	500	850	750	850	280	990	810	800	600	950	400	1120	510
124	1	BK	Thai Bangkaew	800	590	1270	390	1400	490	1320	900	1250	700	1150	580	1350	580	700	250	1190	620	1200	370
125	3	BK	Thai Bangkaew	1050	660	1300	400	1200	650	1100	420	700	390	1120	350	1250	650	680	280	1010	470	1070	410
126	12	BK	Thai Bangkaew	720	400	1190	1010	1010	800	1200	700	1170	1020	1010	390	1200	750	920	300	920	900	1020	420
127	15	BK	Thai Bangkaew	1350	700	1130	520	900	850	750	370	1120	850	900	420	750	500	650	620	1260	920	1000	600
128	2	BK	Thai Bangkaew	750	500	1100	850	1150	950	1300	1200	1200	1000	1350	900	700	550	600	580	1220	1010	850	700
129	4	BK	Thai Bangkaew	1050	800	1010	480	800	490	1120	1000	1000	950	800	700	1180	1120	1150	1100	1150	800	800	750
130	9	BK	Thai Bangkaew	1210	1120	850	750	790	650	1050	800	1200	510	1230	1100	1010	1000	1010	900	1010	950	970	850
131	13	BK	Thai Bangkaew	950	880	1210	1200	1220	1110	520	420	800	550	1150	1120	1100	900	700	650	1190	520	810	650
132	1	BEA	Beagle	1300	420	1000	300	1220	550	800	450	850	350	1150	400	1100	320	900	400	1010	490	1070	590
133	5	BEA	Beagle	1150	370	900	380	1110	530	950	520	700	390	1110	580	1120	350	1040	450	1070	420	1000	220
134	6	BEA	Beagle	1350	390	1100	320	1090	700	700	620	980	420	1210	480	1170	400	1120	330	950	470	900	300
135	9	BEA	Beagle	1450	400	1250	400	1120	790	1000	700	1200	450	1230	600	1200	580	1230	500	900	520	1100	350
136	11	BEA	Beagle	1000	320	1150	390	1010	600	1050	800	1170	500	1100	420	1130	550	1350	550	1150	580	850	450
137	12	BEA	Beagle	880	800	700	310	1100	800	1020	850	1100	510	1300	700	1350	500	1300	360	720	620	800	480
138	13	BEA	Beagle	950	550	800	500	950	850	800	700	1300	1200	1350	800	1050	700	1200	580	1190	350	1180	500
139	14	BEA	Beagle	1210	500	1200	240	850	350	1100	580	1000	850	1200	660	1250	1120	1180	510	1220	700	1020	510
140	15	BEA	Beagle	800	600	670	610	1300	1010	1120	950	1020	980	1020	850	1180	650	1010	490	1110	500	1250	200
141	17	BEA	Beagle	650	600	610	300	1400	420	390	330	980	800	390	350	900	720	1040	300	900	600	750	280
142	18	BEA	Beagle	1210	450	600	310	650	500	680	500	800	600	400	320	810	800	700	280	920	650	260	250
143	19	BEA	Beagle	1050	1000	500	410	1280	950	850	450	850	700	420	390	1130	600	800	600	420	400	700	400
144	20	BEA	Beagle	1350	1050	1000	700	700	550	1050	1000	700	500	1200	1000	1050	810	620	360	800	720	1350	600
145	21	BEA	Beagle	550	500	900	670	790	700	520	450	510	400	1000	500	800	660	1120	620	1150	650	1220	650
146	22	BEA	Beagle	1300	950	1150	1100	500	400	620	520	400	350	900	550	350	320	1010	900	650	450	1300	700
147	23	BEA	Beagle	900	880	1050	1000	550	530	680	580	950	390	660	400	500	400	360	280	1010	950	600	510
148	25	BEA	Beagle	1120	700	1010	350	1180	610	950	480	650	350	1100	280	1120	380	780	700	1260	1220	1200	750
149	27	BEA	Beagle	1030	660	900	380	1350	850	850	520	1000	850	1110	480	1110	1100	1080	900	1110	470	1150	800
150	28	BEA	Beagle	950	750	890	650	1300	1050	1020	620	600	550	1190	500	550	500	1010	490	720	450	1320	850
151	29	BEA	Beagle	1280	900	450	400	1260	720	750	620	1050	1020	1210	580	1180	1000	1300	1180	1070	950	550	220
152	30	BEA	Beagle	750	700	1100	890	1050	450	1020	950	1170	1120	1230	600	1250	1220	1180	1080	600	490	450	300
153	2	BEA	Beagle	660	600	650	600	610	550	600	500	750	650	950	780	790	660	400	380	920	900	1120	680
154	3	BEA	Beagle	1050	590	900	400	1350	530	800	420	700	450	1210	1190	750	700	650	400	1190	520	810	410
155	8	BEA	Beagle	1120	1030	1130	900	1400	1300	1050	1000	1000	700	1190	1150	1000	750	920	650	1150	920	680	420
156	10	BEA	Beagle	500	400	480	450	1300	1220	1000	800	1050	1000	1150	1100	1200	800	700	680	900	800	970	470
157	16	BEA	Beagle	1150	1120	1210	550	1200	1150	900	700	390	350	1100	1010	1290	1200	1010	920	800	620	590	550
158	24	BEA	Beagle	720	590	1250	1190	1180	1110	750	420	1100	1050	1120	900	580	550	1150	1100	1260	1150	500	350
159	7	BEA	Beagle	700	550	1270	1150	600	490	1380	1200	1250	1100	700	600	1350	650	1080	650	950	920	970	650
160	3	BULLY	American Bully	1000	700	1220	750	1280	1020	1000	560	1350	900	1300	590	1300	500	1300	1090	1350	950	1300	620
161	4	BULLY	American Bully	1040	480	850	690	1150	900	560	520	800	330	1200	1050	1340	1000	1200	800	1210	780	1200	550
162	5	BULLY	American Bully	1280	570	700	400	1100	400	680	0	1160	550	800	700	800	600	0	0	1050	600	1400	1005
163	9	BULLY	American Bully	800	620	500	410	1080	750	950	490	1050	620	1250	520	1270	1100	1010	380	1300	400	930	480
164	10	BULLY	American Bully	1150	680	900	390	1210	700	880	680	710	650	1350	910	1110	360	1120	480	1110	500	780	370
165	6	BULLY	American Bully	1350	750	1070	650	1350	680	1330	1120	1250	1120	1000	500	1210	900	1350	950	1250	750	1220	1100
166	8	BULLY	American Bully	900	500	1100	800	1190	620	1280	1190	1100	1080	1150	570	1160	1050	1150	850	850	450	1150	1050
167	1	BULLY	American Bully	980	800	1010	550	950	500	1200	1090	1020	850	1010	470	1090	980	1050	500	1000	800	1120	850
168	1	BULLY	American Bully	1200	520	780	600	780	610	1210	1020	1000	600	850	620	1180	790	900	350	980	600	1000	710
169	2	YORK	Yorkshire Terrier	1450	580	1150	370	1400	1030	750	620	1210	900	1100	870	1200	980	1110	400	1180	1050	1200	1050
170	3	YORK	Yorkshire Terrier	1350	440	1120	300	1100	320	900	810	1130	690	1020	700	1350	650	1220	850	950	850	1160	950
171	4	YORK	Yorkshire Terrier	1210	810	1230	390	1150	800	1100	350	1080	320	1000	550	1220	800	780	580	850	450	1320	1110
172	5	YORK	Yorkshire Terrier	1150	670	1050	440	1010	520	850	580	1020	620	900	360	1160	700	700	270	680	590	1080	250
173	7	YORK	Yorkshire Terrier	1020	400	850	460	1300	460	1130	530	1120	380	1220	510	1100	600	630	490	1150	800	1350	750
174	9	YORK	Yorkshire Terrier	1500	700	1160	1000	1080	1000	1010	950	1000	350	1150	1090	1300	720	1070	520	1220	750	1000	400
175	18	YORK	Yorkshire Terrier	1400	1290	1350	305	1450	890	1220	400	1300	1260	850	800	1020	850	1050	300	1300	950	1450	380
176	1	YORK	Yorkshire Terrier	1100	950	1300	410	1350	570	1350	370	1370	750	1450	750	1010	580	1280	1170	1350	400	1250	650
177	6	YORK	Yorkshire Terrier	1040	390	800	400	850	250	1300	380	1450	570	1290	850	1120	500	1350	450	1280	370	820	550
178	10	YORK	Yorkshire Terrier	1070	880	900	580	950	850	1200	850	1100	1020	750	650	1070	530	1210	750	1050	680	1100	570
179	11	YORK	Yorkshire Terrier	800	550	1210	700	1200	1080	350	310	1180	880	650	600	920	430	1000	350	1120	1100	700	420
180	12	YORK	Yorkshire Terrier	750	480	1270	780	700	600	700	600	950	550	1010	900	1140	450	750	410	1090	1000	1300	350
181	14	YORK	Yorkshire Terrier	600	370	1110	650	750	390	800	700	880	500	600	540	900	390	800	380	800	500	500	480
182	15	YORK	Yorkshire Terrier	1250	420	950	800	650	500	1050	500	800	490	1200	400	750	320	670	500	750	530	900	300
183	16	YORK	Yorkshire Terrier	620	600	1100	900	600	290	1000	530	700	480	1180	1020	530	370	950	800	650	600	800	510
184	13	YORK	Yorkshire Terrier	690	380	1010	950	500	420	1070	600	600	430	540	450	1250	920	900	610	1100	420	620	450
185	2	HUS	Siberian Husky	1500	700	950	500	1150	520	1130	450	1210	1130	1100	1000	1350	1160	900	320	1220	500	1160	1050
186	3	HUS	Siberian Husky	1450	440	900	390	1400	650	1180	900	1130	350	1020	900	1250	1020	1170	270	1180	530	1050	750
187	6	HUS	Siberian Husky	1350	400	1350	330	1200	390	900	620	1220	1210	1290	1100	1140	900	410	350	1150	590	950	650
188	7	HUS	Siberian Husky	1150	480	1120	300	1300	800	1220	1000	1370	1300	1000	870	1070	530	1110	410	1090	600	1300	820
189	13	HUS	Siberian Husky	1040	580	1230	400	1110	600	810	380	1080	1020	900	870	1200	1140	1000	280	1120	650	1110	950
190	14	HUS	Siberian Husky	950	700	1150	220	1080	500	1300	330	1020	900	870	700	1020	980	1280	1110	950	380	510	400
191	16	HUS	Siberian Husky	880	690	850	170	1030	570	1000	310	350	290	700	330	1160	1070	1100	1050	1050	750	480	400
192	17	HUS	Siberian Husky	620	370	1100	140	1100	250	1250	1100	290	250	1120	800	900	850	800	450	1280	1220	300	290
193	18	HUS	Siberian Husky	1210	620	750	370	850	370	1100	700	880	570	650	600	800	700	700	490	850	420	350	250
194	19	HUS	Siberian Husky	580	550	800	410	600	460	1050	810	700	620	600	540	850	600	1050	370	750	650	650	600
195	21	HUS	Siberian Husky	1250	750	700	460	890	700	750	500	1300	380	1200	450	750	650	1220	520	680	600	500	420
196	22	HUS	Siberian Husky	1070	700	530	300	750	390	1070	1050	620	550	1180	1100	650	390	630	500	600	590	570	510
197	30	HUS	Siberian Husky	900	880	390	330	1400	1300	800	600	1450	1180	1100	1020	980	850	1070	400	590	530	600	510
198	31	HUS	Siberian Husky	1210	800	1350	1230	1200	1110	620	450	800	700	1020	1000	600	350	850	490	530	500	1200	1110
199	1	HUS	Siberian Husky	1400	950	1450	305	1500	460	1010	370	1260	1220	800	510	1220	1010	1280	300	1300	1150	1450	1100
200	4	HUS	Siberian Husky	1200	900	1050	180	1150	420	950	400	1000	690	1450	1220	720	500	780	580	480	370	1320	1000
201	5	HUS	Siberian Husky	1100	1020	1010	510	520	370	850	350	690	600	1150	480	1300	1010	600	270	1350	1300	1080	800
202	8	HUS	Siberian Husky	1290	600	310	280	1110	520	1200	750	600	500	850	650	580	430	950	780	1280	450	1000	500
203	9	HUS	Siberian Husky	1020	500	305	250	1000	950	700	580	500	400	750	550	1100	800	1070	950	1220	1050	1250	1080
204	10	HUS	Siberian Husky	810	750	1230	1010	1080	1010	1010	950	1100	800	550	500	1010	720	610	300	1100	1090	1100	900
205	11	HUS	Siberian Husky	480	420	1010	900	1280	1200	500	470	1120	1000	510	420	720	530	500	450	450	370	620	600
206	12	HUS	Siberian Husky	950	670	900	780	1030	850	1200	950	1290	1260	1180	510	700	490	1050	380	1000	480	1200	570
207	15	HUS	Siberian Husky	1450	480	780	750	1010	890	1130	900	490	430	900	850	500	350	750	700	1150	1000	400	380
208	20	HUS	Siberian Husky	1500	1400	750	700	890	800	1100	1010	480	380	1000	900	530	430	630	610	1090	800	1450	1200
209	23	HUS	Siberian Husky	1150	1070	700	650	1500	1150	530	500	430	320	500	420	1350	1220	950	780	1280	1100	900	620
210	25	HUS	Siberian Husky	1400	800	1300	440	1350	500	1200	1070	1180	1080	1220	1020	450	390	1210	670	1000	420	1350	1160
211	26	HUS	Siberian Husky	1350	1210	580	460	1200	570	600	500	950	880	540	450	920	580	1050	1000	1100	500	750	450
212	27	HUS	Siberian Husky	1100	1040	1270	590	1110	700	1350	800	750	490	1010	750	1120	920	1000	950	1120	530	550	480
213	28	HUS	Siberian Husky	1040	950	1210	1120	1080	650	700	530	570	480	480	400	580	450	1280	1220	850	590	820	700
214	32	HUS	Siberian Husky	600	380	1120	1100	950	800	530	500	900	750	1180	850	1220	1120	1350	1210	1220	1180	800	500
215	24	HUS	Siberian Husky	690	600	950	900	650	520	1350	1300	550	350	1200	1010	850	450	670	380	750	680	700	550
216	1	FRE	French Bulldog	1220	960	910	790	1350	470	960	580	860	350	1020	810	1240	450	900	580	680	450	1260	480
217	7	FRE	French Bulldog	1110	1100	900	820	1210	490	1050	520	990	860	850	700	1300	510	800	450	1200	500	1450	540
218	8	FRE	French Bulldog	1300	790	820	470	1250	550	850	600	1150	1110	1150	1020	1210	360	1020	410	1350	410	1300	580
219	9	FRE	French Bulldog	1010	800	1150	1090	1150	650	800	680	1250	900	1110	1090	1450	390	1010	490	1300	400	1350	450
220	10	FRE	French Bulldog	960	790	1000	410	1120	620	700	520	1180	990	900	800	1100	420	1120	500	1400	570	1210	600
221	11	FRE	French Bulldog	1450	390	800	590	1060	750	1050	960	1220	1180	1090	1000	1290	600	1130	600	1010	370	1180	690
222	13	FRE	French Bulldog	1100	1010	1440	1390	1020	790	850	750	900	600	1210	1110	1000	530	705	370	1260	510	1120	780
223	14	FRE	French Bulldog	690	350	1090	900	920	880	1360	1020	650	580	850	670	900	690	790	700	1130	320	1100	810
224	15	FRE	French Bulldog	710	690	1050	600	600	390	1290	1200	600	480	1000	900	1120	500	700	410	1050	360	1070	800
225	16	FRE	French Bulldog	800	710	700	650	1020	820	960	750	1350	1280	800	630	995	800	1240	1230	1240	700	990	610
226	17	FRE	French Bulldog	1280	1110	1190	910	550	490	850	800	520	480	630	505	1120	900	1130	1020	1080	610	890	560
227	18	FRE	French Bulldog	790	390	700	0	820	550	800	680	1110	1040	420	380	420	400	1120	1010	990	780	900	890
228	19	FRE	French Bulldog	680	600	0	700	1350	1060	680	580	480	420	450	420	570	500	900	800	900	800	500	400
229	20	FRE	French Bulldog	900	850	700	0	1210	1150	580	520	1040	900	590	490	500	400	705	700	800	360	1220	1000
230	21	FRE	French Bulldog	1380	1300	0	700	1150	1120	1050	850	500	350	1020	900	610	530	600	500	780	500	810	690
231	22	FRE	French Bulldog	1070	960	700	0	1120	1020	960	680	420	370	540	500	690	390	490	450	1010	900	1300	1260
232	23	FRE	French Bulldog	1190	1030	850	700	1300	410	800	600	950	700	950	600	1400	420	1260	370	1130	530	840	630
233	24	FRE	French Bulldog	1130	870	1240	400	1280	440	900	800	950	490	740	590	1270	360	1210	410	1100	570	1450	430
234	25	FRE	French Bulldog	1320	1220	950	450	1220	520	750	700	1100	1020	520	490	1350	500	1120	490	1020	410	1260	400
235	26	FRE	French Bulldog	870	680	1120	800	605	600	600	520	820	400	1270	1150	1100	600	1080	480	1210	500	1220	380
236	27	FRE	French Bulldog	1030	850	1280	1050	1170	500	700	520	1000	700	1250	1070	1010	570	820	600	950	600	1400	1300
237	29	FRE	French Bulldog	640	420	1060	750	710	605	900	600	350	300	670	520	910	650	800	500	990	610	900	800
238	30	FRE	French Bulldog	1050	640	750	540	390	320	1050	960	1280	800	1360	580	1180	530	1450	750	610	500	1180	1120
239	3	FRE	French Bulldog	820	570	700	0	1090	690	960	650	370	320	1230	740	1150	610	620	230	570	530	1450	1350
240	6	FRE	French Bulldog	1250	820	590	410	950	750	1000	800	1200	710	700	540	1120	700	1300	250	1300	1240	1260	1220
241	12	FRE	French Bulldog	750	470	1210	950	850	790	1050	850	600	420	1180	950	1100	750	750	650	1450	1080	1210	1180
242	28	FRE	French Bulldog	850	430	470	380	1280	1220	1090	1000	710	500	1230	1210	1070	800	1360	250	1020	950	780	480
243	4	FRE	French Bulldog	600	490	1300	850	990	600	1170	1120	1020	750	1070	850	820	600	1210	1130	1150	1050	1280	1260
244	5	FRE	French Bulldog	570	530	1110	510	1210	1090	1210	1170	750	520	810	520	950	850	1300	1100	850	650	1100	450
245	8	POOD	Poodle	1220	960	1280	450	1350	600	1170	1050	1250	1000	1250	670	1400	1120	1340	750	1240	950	1450	900
246	9	POOD	Poodle	1190	800	1090	1010	1300	380	1050	900	1280	350	1360	420	1300	360	1210	280	1210	1130	780	690
247	11	POOD	Poodle	1280	870	1210	540	920	710	900	800	1350	820	1210	490	1120	650	1300	500	1200	800	1260	520
248	12	POOD	Poodle	1070	690	950	400	1210	650	750	700	1110	320	1090	580	1180	500	1450	1260	1130	500	1220	480
249	15	POOD	Poodle	870	640	1190	650	350	320	700	600	1220	300	1180	600	1270	420	1130	800	1100	530	1180	430
250	16	POOD	Poodle	1250	640	1120	700	1170	550	800	520	1150	600	1150	380	1150	570	1120	490	800	700	1400	540
251	17	POOD	Poodle	1030	790	1240	1050	1120	500	600	520	1040	390	850	500	1010	690	1080	1020	700	610	1120	380
252	20	POOD	Poodle	690	490	850	410	950	490	1050	800	950	490	1070	580	910	900	1020	370	1010	680	900	800
253	24	POOD	Poodle	1010	430	590	380	1280	520	850	750	750	420	1020	740	800	700	900	650	950	600	800	630
254	4	POOD	Poodle	390	350	1110	1060	880	800	1210	960	1200	1100	1230	540	1000	750	1240	620	1020	0	1350	600
255	6	POOD	Poodle	820	600	800	470	1220	1150	1220	1200	1180	900	1000	900	1450	1210	1100	230	1350	400	1210	580
256	7	POOD	Poodle	1050	420	820	600	990	790	1200	1000	1100	400	950	505	1240	1100	1360	250	1450	1300	1070	810
257	10	POOD	Poodle	1320	1130	0	0	1020	850	1290	850	990	480	800	700	1070	950	1010	900	1150	1100	1280	500
258	14	POOD	Poodle	750	570	0	0	1100	1090	1360	1090	1020	370	810	630	995	950	800	600	1080	570	1100	1030
259	19	POOD	Poodle	790	530	0	0	790	690	1090	960	700	520	1320	520	1290	600	820	700	1050	650	890	560
260	22	POOD	Poodle	990	490	470	380	690	470	1120	900	800	710	1110	590	820	610	1260	540	990	780	1300	1000
261	23	POOD	Poodle	850	470	1000	510	800	700	1080	850	900	500	1270	1110	1350	510	790	580	850	450	990	780
262	2	SPI	Spitz	700	590	610	510	830	690	1450	440	1000	580	1000	650	1450	400	1400	340	420	400	1290	470
263	3	SPI	Spitz	610	400	1290	450	1110	555	1350	880	1280	490	1360	510	800	700	1240	470	1090	520	1140	550
264	4	SPI	Spitz	1210	440	1000	500	1290	790	700	500	1150	310	1500	1240	1280	520	1220	500	920	580	990	600
265	5	SPI	Spitz	1300	800	1500	680	1450	340	1280	610	940	680	700	380	1080	610	1060	600	600	550	850	790
266	7	SPI	Spitz	1200	750	720	330	1020	940	1060	550	590	370	900	470	1210	370	1280	710	820	490	1320	360
267	6	SPI	Spitz	1180	890	940	400	1180	480	1000	810	1190	1020	1180	780	970	900	790	590	780	780	1170	1010
268	1	TRB	Thai Ridge Back	1200	890	370	330	1200	550	1010	350	500	370	690	500	1150	350	1020	480	1090	450	380	320
269	2	TRB	Thai Ridge Back	1140	1010	1450	300	890	450	1350	280	1500	1000	1040	700	550	360	1300	500	1100	500	1200	1000
270	3	TRB	Thai Ridge Back	850	380	1160	590	1450	950	1050	700	1310	450	650	580	1400	1000	800	450	1320	800	1450	410
271	1	CHOW	Chow Chow	900	890	1300	390	850	800	800	510	1450	520	1280	690	1150	1110	800	650	900	800	1380	580
272	2	CHOW	Chow Chow	1300	550	1110	500	920	500	850	750	1280	1210	1350	700	1450	730	1450	1120	950	650	1080	550
273	3	CHOW	Chow Chow	850	350	830	480	1050	780	1240	480	1120	820	1070	1010	1350	950	1160	400	1000	780	1200	800
274	1	COR	Welsh Corgi	1010	650	1390	400	1450	1050	950	350	1450	450	1150	820	520	400	560	220	750	380	1100	410
275	2	COR	Welsh Corgi	900	890	1110	330	1300	720	850	650	1190	520	1070	550	1150	820	700	480	1000	700	1170	550
276	3	COR	Welsh Corgi	1450	1400	830	550	1280	700	900	500	1280	370	1180	700	1210	700	1220	1050	950	650	1380	480
277	1	CAR	Cavalier King Charles Spaniel	1010	350	1190	1000	1280	920	1000	400	1380	600	600	550	1300	700	1050	910	950	500	1170	510
278	2	CAR	Cavalier King Charles Spaniel	550	400	1450	900	950	570	750	580	900	710	950	400	1090	500	580	280	700	550	1380	1200
279	1	PEK	Pekingese	1040	380	1110	600	890	780	1100	650	1000	480	1300	580	1230	380	1220	1020	1050	720	1080	410
280	2	PEK	Pekingese	690	490	1300	800	920	850	950	500	1380	1040	730	650	1300	400	1200	280	700	400	700	580
281	3	PEK	Pekingese	1450	920	1080	480	1230	1070	750	700	1280	630	1190	1070	850	780	1120	900	950	750	1250	750
282	1	DOB	Doberman Pinscher	1400	800	1450	390	1070	800	1300	950	1210	350	1250	510	1300	950	480	280	1050	1010	1080	630
283	2	DOB	Doberman Pinscher	690	420	1390	1160	780	480	320	280	1380	850	1070	580	1400	380	1050	750	500	380	1380	990
284	3	DOB	Doberman Pinscher	1210	920	1190	590	550	500	600	350	1250	710	1190	650	1230	1040	1290	800	900	720	580	400
285	2	BOS	Boston Terrier	690	400	1390	450	1450	1280	1260	580	1310	1000	1300	1190	1210	450	1220	480	1250	450	800	630
286	1	BOS	Boston Terrier	600	380	1250	590	1230	700	1050	650	1250	600	550	450	800	520	1100	700	700	380	1250	1000
287	3	BOS	Boston Terrier	990	920	950	380	1050	600	600	510	1500	440	800	500	1010	700	910	400	1000	500	900	700
288	1	WEST	West Highland White Terrier	920	600	1450	800	1230	770	1050	750	800	630	1210	1150	1180	520	700	400	850	450	1030	580
289	3	WEST	West Highland White Terrier	1010	400	830	450	1450	1070	700	510	1310	1150	700	550	1300	750	1220	750	750	590	1450	750
290	3	BIC	Bichon Frise	1010	700	1320	1100	1070	680	950	700	1150	710	1100	650	1400	450	560	300	650	530	1000	400
291	1	BIC	Bichon Frise	1140	380	1450	550	1450	1090	1240	600	820	520	1070	950	850	550	1250	700	780	700	1450	1250
292	2	BIC	Bichon Frise	890	400	600	590	1280	920	1120	900	1280	370	1320	1210	1090	730	1350	1130	1090	1000	1080	990
293	2	COCK	Cocker Spaniel	1010	850	1390	1320	680	550	950	400	1150	390	1150	820	1400	1040	560	300	1010	650	1080	400
294	3	COCK	Cocker Spaniel	1140	920	1220	370	1100	570	1350	440	1500	1450	950	730	1090	700	1000	750	1130	800	1450	1170
295	4	COCK	Cocker Spaniel	1040	550	520	400	1450	920	1010	500	1000	490	1210	1000	730	550	1290	900	1100	400	990	630
296	5	COCK	Cocker Spaniel	990	890	1190	950	1280	800	800	600	1380	820	1100	1010	1230	580	500	380	1250	700	1250	600
297	6	COCK	Cocker Spaniel	450	380	1450	390	1390	700	1240	850	1280	560	1040	690	1000	800	1160	1020	1090	850	1200	510
298	1	BULL	Bull Terrier	680	360	1050	720	1180	1040	1120	1080	900	280	1000	450	1300	1040	1130	620	1250	1120	950	650
299	2	BULL	Bull Terrier	1140	490	1230	450	1080	550	800	420	1100	850	1140	1030	1100	890	1280	480	1180	1070	900	430
300	3	BULL	Bull Terrier	1200	650	1110	850	800	680	1250	750	1090	360	1110	1000	1130	600	1160	370	1100	390	390	310
301	4	BULL	Bull Terrier	1050	700	1350	1180	1400	900	1140	1050	1230	420	360	340	1050	420	600	350	850	600	1260	590
302	2	PIT	American Pit Bull Terrier	1170	390	450	260	700	390	800	500	410	360	1090	960	1270	380	1150	680	1250	990	1000	620
303	3	PIT	American Pit Bull Terrier	650	420	1090	320	1000	600	600	400	800	700	700	600	1150	490	1050	440	750	470	850	490
304	4	PIT	American Pit Bull Terrier	530	360	750	400	1100	450	950	750	510	320	1110	800	1040	660	1120	750	1350	1040	780	540
305	1	PIT	American Pit Bull Terrier	850	500	420	370	1240	1120	1350	550	1000	900	1050	1000	1230	1000	600	350	600	390	430	360
306	5	PIT	American Pit Bull Terrier	1300	1220	1050	850	1400	800	1280	1120	1170	1090	1220	450	700	420	1250	370	1120	1000	1350	390
307	1	ROTT	Rottweiler	1170	600	1110	260	450	410	850	400	800	360	1090	500	1270	900	1200	750	1350	1130	1000	400
308	2	ROTT	Rottweiler	1050	490	480	310	1210	1200	700	500	1020	1000	800	600	1210	1190	1010	440	1260	750	850	620
309	3	ROTT	Rottweiler	850	400	1050	850	600	520	1250	1050	900	340	1220	1030	890	720	1280	370	1290	390	950	500
310	4	ROTT	Rottweiler	1300	360	700	420	1120	650	1230	900	1230	1050	1110	700	1100	600	1050	580	1120	600	1260	1130
311	5	ROTT	Rottweiler	1220	550	720	600	1400	1080	1080	750	1090	280	1160	450	1000	420	1350	680	900	480	590	490
312	1	BULLD	Bulldog	1270	1050	790	650	580	390	1000	400	1130	340	1030	450	1210	1190	1200	330	1260	650	850	490
313	2	BULLD	Bulldog	650	490	550	310	1080	700	950	600	1020	750	1200	800	900	490	1120	620	1290	1040	1000	540
314	3	BULLD	Bulldog	1170	800	1020	280	1150	650	850	500	850	410	960	680	1270	680	800	440	990	550	1350	620
315	4	BULLD	Bulldog	590	360	900	420	900	490	1080	750	320	280	1110	580	1120	700	1050	560	820	390	650	380
316	6	BULLD	Bulldog	850	400	1350	1050	1330	1240	1160	1140	1050	900	1000	700	1300	1100	1350	700	1250	800	1180	1130
317	1	MINI	Miniature Pinscher	1170	1050	1110	260	1300	700	950	600	1100	360	1220	450	1350	380	1200	750	1350	450	850	290
318	3	MINI	Miniature Pinscher	600	390	950	290	1200	390	850	350	1020	400	1030	380	1210	490	1150	400	1250	650	1050	500
319	5	MINI	Miniature Pinscher	800	500	750	420	900	550	1080	750	900	510	900	580	1130	500	1160	450	1180	700	1130	400
320	2	MINI	Miniature Pinscher	1350	630	1180	520	1180	600	1010	500	1230	1090	1280	680	1120	600	1050	580	800	550	1350	1260
321	4	MINI	Miniature Pinscher	1200	720	1050	600	1040	680	1350	900	1170	280	700	500	1040	720	1280	950	1100	900	1250	650
322	6	MINI	Miniature Pinscher	1120	650	650	400	1240	490	1000	650	750	450	1160	800	850	660	600	480	1000	820	950	360
323	2	SCH	Schnauzer	400	360	1110	350	1200	580	950	700	850	360	1030	640	900	490	1120	330	1260	750	1090	400
324	3	SCH	Schnauzer	1350	1170	800	310	1100	410	420	350	1020	410	1110	500	890	660	1050	400	1130	450	1000	430
325	5	SCH	Schnauzer	1050	390	1200	280	650	390	600	500	1130	1100	1220	900	1350	700	1200	1150	1070	650	850	680
326	6	SCH	Schnauzer	1000	500	950	420	1240	520	1080	530	1050	900	580	450	1130	850	560	480	850	390	1130	590
327	1	SCH	Schnauzer	850	700	700	600	1400	550	850	750	1250	1170	1050	960	1040	1000	1350	680	1350	1000	380	360
328	4	SCH	Schnauzer	1300	750	520	400	800	680	1350	1160	510	280	1300	1280	1270	550	1280	900	900	820	1350	950
329	1	SAM	Samoyed	1170	340	1110	320	1350	520	850	500	850	320	1110	500	1150	380	1150	330	1100	500	1250	390
330	6	SAM	Samoyed	1220	390	1200	370	1400	580	950	400	1020	360	960	600	1270	490	1250	400	1040	450	1180	430
331	2	SAM	Samoyed	1120	450	1020	400	1200	680	1000	600	1230	1130	1030	640	1350	750	1050	440	1200	650	1130	620
332	4	SAM	Samoyed	1050	490	900	450	1150	700	750	700	850	400	900	800	1050	850	1010	480	1260	820	850	680
333	5	SAM	Samoyed	900	550	800	600	1040	800	1080	650	1000	450	1050	530	1000	420	950	580	1000	390	900	490
334	3	SAM	Samoyed	750	630	700	520	950	490	1350	1280	900	510	1200	450	1100	700	700	680	1350	1250	1000	0
335	1	GD	Great Dane	1090	600	1150	480	1500	580	850	750	1190	450	1270	490	1500	500	1400	340	1080	950	600	520
336	1	DOGO	Dogo Argentino	750	390	1010	550	1450	650	750	680	1000	550	1210	580	1380	320	1390	410	1000	900	1150	650
337	1	AKI	Akita Inu	890	550	1260	800	1280	990	680	650	1020	650	1130	1110	1400	1270	1270	500	800	700	1030	950
338	1	FILA	Fila Brasileiro	1230	680	750	370	1170	780	650	600	950	370	950	440	1000	520	1200	690	650	480	1400	1300
339	1	BORD	Border Collie	990	490	1050	880	1110	720	500	430	900	600	1000	600	1100	850	1040	780	1100	580	950	810
340	6	POM	Pomeranian	1220	590	1130	370	1500	440	800	530	950	340	1100	500	1350	500	1050	330	850	600	1210	450
341	10	POM	Pomeranian	1200	460	1210	340	1450	450	900	740	1010	390	1040	590	1450	450	900	260	650	440	1220	460
342	11	POM	Pomeranian	1150	690	1020	400	1400	370	1020	480	1100	430	1210	640	1230	350	1290	400	1090	650	1300	490
343	14	POM	Pomeranian	1110	750	1330	480	1300	380	1080	630	1190	490	1340	710	1210	400	1240	280	950	710	1160	380
344	34	POM	Pomeranian	1080	790	910	580	1290	280	1150	800	1250	550	900	800	1150	380	1370	290	1150	780	1140	390
345	35	POM	Pomeranian	1010	890	820	390	1260	290	1210	550	1030	620	800	450	1120	600	1200	450	1030	850	1070	400
346	38	POM	Pomeranian	1050	970	790	450	1210	330	1450	900	1210	710	1000	900	1100	700	1160	490	690	620	1180	405
347	39	POM	Pomeranian	970	460	1600	600	1160	490	1330	500	1500	190	1220	1210	1000	800	1250	380	1220	1030	1100	500
348	40	POM	Pomeranian	890	400	750	370	1120	300	1380	680	1160	1010	1100	1000	1020	950	1050	300	620	590	1010	550
349	41	POM	Pomeranian	900	590	600	580	1100	400	1270	1120	1010	950	1220	1100	1030	850	1120	580	1030	690	1050	520
350	43	POM	Pomeranian	790	690	700	480	1050	610	800	600	880	710	1210	1040	800	380	1010	830	950	850	995	580
351	45	POM	Pomeranian	690	400	1600	1410	960	355	900	700	710	620	1040	900	850	400	900	590	1090	500	990	590
352	46	POM	Pomeranian	1220	1200	1410	1330	870	700	1120	1000	950	550	900	800	750	450	770	620	900	710	1005	610
353	53	POM	Pomeranian	1300	1220	1330	1210	700	550	700	530	900	490	800	710	700	500	830	690	710	520	1000	690
354	59	POM	Pomeranian	1080	1010	1210	1130	1500	1300	630	600	620	430	710	640	1120	1100	1180	770	1200	1150	830	710
355	61	POM	Pomeranian	1150	1110	400	390	780	450	1080	900	550	390	640	590	1290	1210	770	700	600	520	970	800
356	63	POM	Pomeranian	1220	400	910	350	1450	410	850	480	1010	340	1000	450	1350	1210	900	280	800	590	790	310
357	64	POM	Pomeranian	1050	330	820	370	1190	470	900	550	880	580	800	380	1210	1150	750	260	1030	750	710	230
358	65	POM	Pomeranian	1180	460	800	580	1100	490	1080	380	710	650	750	480	1150	1100	690	290	590	330	690	340
359	66	POM	Pomeranian	1250	590	1130	340	1150	400	800	630	1210	1190	1180	420	1200	1080	590	330	420	370	650	390
360	67	POM	Pomeranian	1480	510	1060	1020	1050	550	1330	1270	1480	230	1040	550	1450	1350	800	400	1150	480	620	405
361	68	POM	Pomeranian	1350	290	1210	700	1070	610	1450	1330	1350	250	400	350	1310	1300	1100	450	1130	950	660	345
362	69	POM	Pomeranian	320	305	1020	430	1000	650	1210	1080	1190	260	450	420	1290	1200	1220	490	1300	1250	640	400
363	73	POM	Pomeranian	1110	330	320	285	990	590	1270	1210	1250	290	520	480	1200	1150	950	540	800	620	605	230
364	76	POM	Pomeranian	1500	320	910	800	960	670	1120	390	1100	300	640	520	1150	1120	700	590	1250	1220	590	550
365	77	POM	Pomeranian	1150	390	1410	1300	870	790	500	450	290	250	700	640	1120	1020	1250	1220	620	590	690	590
366	78	POM	Pomeranian	800	690	790	700	840	700	1080	500	1500	1480	750	700	1080	900	1200	1180	1030	800	1220	1210
367	9	POM	Pomeranian	400	390	520	480	800	590	800	630	1480	1350	800	750	900	800	1180	1140	1220	1130	1160	1100
368	12	POM	Pomeranian	900	860	1300	1060	790	780	680	600	1350	1210	1000	800	950	820	1120	1100	520	370	1100	1070
369	13	POM	Pomeranian	860	610	1020	910	900	800	630	500	1210	1190	1010	1000	800	720	1000	950	1300	620	1120	1050
370	42	POM	Pomeranian	610	490	350	340	1290	1150	500	450	1190	1160	1100	1090	820	750	950	900	1250	1150	1070	1020
371	48	POM	Pomeranian	1350	1050	600	520	1260	1100	800	500	1160	1050	1180	1010	720	650	900	800	1130	1030	1050	1010
372	62	POM	Pomeranian	1500	1100	1250	1190	1450	510	900	530	1140	350	1290	1280	750	600	1160	330	950	420	1010	1005
373	70	POM	Pomeranian	1480	1350	1600	750	1370	590	800	630	1100	390	1400	1340	650	600	1050	380	520	420	1260	490
374	79	POM	Pomeranian	1250	390	1190	320	1100	870	740	630	1280	1250	1220	1180	600	560	1200	400	1190	1120	1250	800
375	5	POM	Pomeranian	1220	330	1100	370	1260	610	530	480	1350	1140	1400	1290	560	480	1250	450	1200	1090	1210	520
376	7	POM	Pomeranian	1110	590	960	285	1210	700	1210	1200	550	510	1340	1120	500	350	1220	350	1190	800	1060	1000
377	22	POM	Pomeranian	1080	720	820	300	1220	1070	1150	1100	1010	880	1120	1010	480	450	1120	490	1120	420	1000	970
378	36	POM	Pomeranian	860	800	750	340	1150	650	1080	1000	880	710	1010	950	1280	1020	1370	540	1350	1270	900	830
379	44	POM	Pomeranian	1000	970	500	430	1120	355	1020	900	950	800	950	900	1150	600	1050	590	1270	1200	970	870
380	49	POM	Pomeranian	390	330	480	400	1070	990	1100	1020	710	620	800	700	1080	800	750	500	1090	950	950	770
381	50	POM	Pomeranian	890	860	300	285	960	900	1210	1150	1190	1050	700	590	1190	1150	690	350	1000	590	770	710
382	60	POM	Pomeranian	1350	1080	1330	600	490	380	1000	800	480	430	900	800	1020	350	650	380	590	520	710	690
383	72	POM	Pomeranian	1480	1200	580	520	990	870	800	740	1250	950	590	520	1450	1280	1370	1250	800	420	690	605
384	51	POM	Pomeranian	1200	1100	1130	960	800	510	740	630	430	390	700	520	1350	1210	1200	1050	1350	1090	605	590
385	52	POM	Pomeranian	720	690	680	600	580	490	1200	1080	1010	510	750	550	700	500	1250	1100	1270	1200	590	510
386	47	POM	Pomeranian	1500	420	960	370	1370	1210	1020	600	1140	550	950	900	1000	450	450	350	1120	800	500	360
387	1	SHIH	Shih Tzu	1190	430	1060	320	1100	590	950	490	900	350	1220	440	1270	1210	1240	400	1050	900	1150	390
388	7	SHIH	Shih Tzu	1200	480	1120	350	1190	510	800	470	1020	390	1350	590	1100	880	1350	480	1000	600	1090	480
389	10	SHIH	Shih Tzu	900	570	1010	300	1080	580	1020	520	980	380	1300	500	1240	1010	1050	500	1160	650	1020	450
390	11	SHIH	Shih Tzu	1280	700	1250	390	1210	620	880	620	1350	450	1180	520	1340	1300	700	330	1110	700	1100	500
391	12	SHIH	Shih Tzu	820	680	1220	410	1350	600	680	620	1250	330	1100	620	1300	1090	950	600	1250	850	1200	550
392	17	SHIH	Shih Tzu	800	620	1320	370	1280	700	620	520	1210	490	1300	1220	1090	980	800	500	1220	1000	1020	600
393	18	SHIH	Shih Tzu	750	430	1070	450	1300	680	1120	1020	1300	500	1150	400	1050	750	600	330	1090	850	1400	590
394	19	SHIH	Shih Tzu	700	620	900	490	1000	500	1000	800	1200	480	1010	470	750	500	850	700	850	500	1000	700
395	20	SHIH	Shih Tzu	620	570	800	500	1020	750	1020	680	1160	550	910	700	650	430	500	480	650	550	850	710
396	21	SHIH	Shih Tzu	1200	1190	1100	690	950	820	520	490	1120	570	900	570	1340	1240	1350	1240	600	500	780	480
397	22	SHIH	Shih Tzu	820	390	950	280	820	390	560	400	940	290	300	290	1210	1130	1240	650	1160	1110	620	260
398	23	SHIH	Shih Tzu	570	430	780	530	750	420	950	400	1080	400	320	300	1130	1100	580	550	1110	1000	590	290
399	24	SHIH	Shih Tzu	430	390	530	350	620	450	470	390	1020	600	350	320	790	380	650	450	900	750	550	280
400	26	SHIH	Shih Tzu	1190	480	500	490	1100	1020	1020	950	800	700	850	760	430	340	850	480	1160	650	480	390
401	27	SHIH	Shih Tzu	820	800	480	450	1080	1000	800	680	700	600	800	400	1270	1100	1050	850	1000	850	710	500
402	28	SHIH	Shih Tzu	600	380	410	300	420	390	680	620	900	790	400	350	1010	800	550	400	750	550	340	260
403	29	SHIH	Shih Tzu	700	380	900	850	1280	450	880	560	700	350	1100	590	700	360	1240	350	1300	450	1180	390
404	30	SHIH	Shih Tzu	1150	390	700	500	1210	390	950	520	1200	1160	1050	620	600	500	1320	1100	1190	1120	1050	450
405	33	SHIH	Shih Tzu	1200	430	500	410	1150	500	800	600	1050	1020	900	700	1110	1050	1200	1120	1090	400	1400	1050
406	34	SHIH	Shih Tzu	1040	570	410	400	1100	400	730	680	1350	1200	800	700	1000	700	1090	900	1350	1220	1150	930
407	35	SHIH	Shih Tzu	1000	520	400	390	1080	530	1000	880	1160	800	700	620	1100	600	1100	420	1210	1190	930	810
408	36	SHIH	Shih Tzu	900	680	370	320	1020	590	1000	950	800	710	620	590	500	380	900	500	1120	400	1005	780
409	37	SHIH	Shih Tzu	1000	820	390	320	900	600	990	880	650	600	590	500	470	430	490	480	1300	500	1300	420
410	38	SHIH	Shih Tzu	800	410	900	690	950	580	800	730	710	370	1200	1100	1110	1000	1000	320	1120	550	700	510
411	40	SHIH	Shih Tzu	570	430	850	700	750	620	1090	1000	1120	1100	1100	1050	880	380	800	690	1050	600	800	370
412	41	SHIH	Shih Tzu	680	380	1290	1220	800	700	680	520	620	550	1050	900	1010	880	690	600	1210	780	1005	800
413	2	SHIH	Shih Tzu	1040	1000	580	500	1210	1150	560	490	600	500	1010	910	800	600	650	490	1190	800	1180	510
414	6	SHIH	Shih Tzu	1150	1040	1220	1100	1350	1280	1210	1200	550	490	1000	520	500	430	1120	1090	900	700	510	450
415	8	SHIH	Shih Tzu	980	880	1100	1010	1280	1190	1280	1190	980	350	1100	570	1160	900	1240	350	1090	550	1300	1220
416	9	SHIH	Shih Tzu	880	820	1070	900	1190	1150	1330	1280	1230	1160	1010	620	900	790	1050	400	1000	600	1220	1200
417	13	SHIH	Shih Tzu	1350	1200	1010	850	1150	1080	750	470	1250	1230	900	700	1300	1270	900	450	800	750	1200	1150
418	14	SHIH	Shih Tzu	700	500	850	800	1080	950	1200	1090	1300	1250	1350	1000	1160	1110	1270	1150	980	800	1005	900
419	31	SHIH	Shih Tzu	1350	1150	700	650	950	820	1190	1120	1160	1120	1250	1220	600	360	520	500	1300	1250	900	810
420	39	SHIH	Shih Tzu	1150	1040	650	550	820	750	1120	1020	1210	980	850	800	550	470	1100	950	1350	1300	780	710
421	1	SHIH	Shih Tzu	1000	600	550	480	750	680	1090	820	1000	900	1200	1010	980	550	1150	1050	580	550	1150	1005
422	5	SHIH	Shih Tzu	1040	820	480	410	780	620	800	750	480	400	1100	900	1180	1000	650	580	600	580	1050	1005
423	32	SHIH	Shih Tzu	900	800	1100	1070	620	600	1330	1210	1100	1000	520	470	880	650	580	330	700	600	1000	850
424	2	GOLD	Golden Retriever	1210	470	540	350	1250	480	880	580	820	370	1120	550	1380	350	900	290	820	450	1170	390
425	4	GOLD	Golden Retriever	1110	600	1220	380	1220	400	900	510	940	400	1100	650	1300	1000	1060	340	1190	820	1320	450
426	5	GOLD	Golden Retriever	1030	590	1310	390	1450	520	810	620	1120	460	1240	510	1280	490	1240	420	1070	520	1240	480
427	6	GOLD	Golden Retriever	1300	570	1120	410	1340	600	1040	440	1230	490	1310	680	1000	520	1200	320	1010	600	1200	530
428	7	GOLD	Golden Retriever	890	630	900	510	1180	610	1010	550	1020	520	1050	470	1110	610	790	390	1220	330	1170	550
429	8	GOLD	Golden Retriever	820	440	1050	410	1230	650	800	610	1190	580	1310	750	1210	550	1400	440	1000	580	1140	690
430	9	GOLD	Golden Retriever	800	680	450	390	1130	710	620	550	780	660	1270	1020	1080	650	1220	470	990	550	1090	790
431	10	GOLD	Golden Retriever	720	700	890	500	1020	790	780	620	660	370	1310	940	1010	700	1100	500	920	400	1490	850
432	11	GOLD	Golden Retriever	1010	720	800	290	980	370	1090	1040	1100	400	940	880	910	710	1300	540	1210	490	1050	750
433	12	GOLD	Golden Retriever	700	630	700	350	880	830	1000	780	580	460	1240	1120	1220	810	990	610	1130	630	850	550
434	13	GOLD	Golden Retriever	570	470	660	330	830	790	1010	810	520	490	1120	1050	800	350	1350	680	750	600	950	850
435	14	GOLD	Golden Retriever	1300	1210	1000	660	790	650	810	700	1020	940	650	490	400	390	1010	590	880	700	1490	1320
436	15	GOLD	Golden Retriever	1210	1110	1290	700	650	610	690	400	1120	1020	1050	940	710	420	1240	340	700	590	1320	1240
437	16	GOLD	Golden Retriever	1110	1010	510	380	610	370	800	690	940	780	940	880	650	490	1110	440	590	490	1240	1140
438	17	GOLD	Golden Retriever	1030	890	410	350	1450	340	780	610	1000	660	880	800	1380	1300	1220	540	490	400	1200	1050
439	18	GOLD	Golden Retriever	890	820	1000	790	520	480	550	480	700	600	750	680	1210	1110	1010	500	990	880	850	390
440	20	GOLD	Golden Retriever	1210	470	850	700	1250	1130	810	510	820	370	1120	600	1300	390	680	320	800	420	790	480
441	21	GOLD	Golden Retriever	1110	610	1080	420	1220	1020	700	600	700	240	410	380	1180	300	710	370	750	600	750	690
442	22	GOLD	Golden Retriever	1030	400	600	450	1130	910	900	620	680	490	380	370	1220	400	220	190	630	500	650	470
443	23	GOLD	Golden Retriever	1120	600	1180	900	1310	1250	1120	700	660	400	1180	410	690	610	610	340	550	420	1090	530
444	24	GOLD	Golden Retriever	1010	570	900	850	1110	880	1240	1120	580	460	1210	470	700	690	1040	1010	800	750	750	600
445	25	GOLD	Golden Retriever	890	610	1080	1000	1020	790	1120	1010	520	460	1100	510	1160	800	1100	500	750	630	690	590
446	26	GOLD	Golden Retriever	600	470	1260	1220	910	830	1010	880	460	400	940	600	1050	710	1280	1240	630	600	1240	1110
447	27	GOLD	Golden Retriever	700	680	890	590	880	620	1240	1210	400	370	1020	490	1210	1110	1220	400	700	420	1110	1090
448	28	GOLD	Golden Retriever	1450	1300	790	490	710	610	1210	900	1000	850	1080	620	1110	1100	1400	1300	1130	1100	1320	950
449	29	GOLD	Golden Retriever	1300	1210	1310	900	620	590	1060	810	940	820	850	680	1100	1000	1350	1280	1100	1030	1090	850
450	30	GOLD	Golden Retriever	1380	1120	890	420	590	550	900	880	780	680	800	470	1010	900	1180	1110	1030	880	950	750
451	32	GOLD	Golden Retriever	1300	1110	850	600	550	490	810	720	850	700	1000	800	970	800	1240	1220	880	750	850	790
452	33	GOLD	Golden Retriever	1110	1010	1310	890	1150	1130	720	620	700	660	680	620	900	710	1040	1010	750	700	700	690
453	34	GOLD	Golden Retriever	1010	960	1000	850	1450	1310	1120	1060	940	850	620	600	1380	1300	1100	1090	1130	630	690	600
454	35	GOLD	Golden Retriever	960	890	850	610	880	790	620	550	660	580	900	850	610	550	900	790	1210	1130	790	750
455	36	GOLD	Golden Retriever	890	700	800	510	1020	710	550	480	580	520	490	470	1280	970	680	610	600	490	650	590
456	38	GOLD	Golden Retriever	910	820	1310	500	1390	1370	1280	1210	1020	940	1240	450	1450	1280	650	540	1090	520	1290	470
457	39	GOLD	Golden Retriever	470	440	1050	450	1370	480	1300	1280	940	700	1120	1020	1300	1220	540	470	920	550	850	0
458	40	GOLD	Golden Retriever	610	570	1500	1290	1270	555	1450	1400	1150	1100	1360	1100	1220	1180	420	390	880	580	1140	580
459	42	GOLD	Golden Retriever	910	890	500	400	1250	680	1180	990	1230	1150	1000	900	1180	1050	1300	1180	800	590	1200	800
460	3	GOLD	Golden Retriever	1260	1180	940	420	1180	830	1400	1100	1390	750	1020	780	1050	850	710	690	790	780	450	360
461	19	GOLD	Golden Retriever	1300	1260	790	400	1190	370	1350	1300	1310	1300	900	680	850	550	520	500	1070	790	600	450
462	31	GOLD	Golden Retriever	1210	910	720	330	1080	940	1300	1000	1210	1190	1500	1360	900	800	1220	1200	710	600	1010	950
463	41	GOLD	Golden Retriever	750	590	680	540	555	340	700	510	1300	1280	1240	1180	1450	1210	1040	900	500	490	1170	1010
