# Supplementary material for: Genetic variations and dog breed identification using inter-simple sequence repeat markers coupled with high resolution melting analysis
Source: PeerJ. 2020 Oct 30;8:e10215. doi: 10.7717/peerj.10215 (PMC7605226; doi:10.7717/peerj.10215)
Supplement: Supplemental Information 3 [file peerj-08-10215-s003.xlsx]

## Sheet: Sheet2
Table supplement 1	Number of bands and band size range from each primer from 43 different dog breeds
Breeds	Number of samples	UBC809		UBC817		UBC818		UBC823		UBC825		UBC826		UBC827		UBC835		UBC844		UBC848
		Number of bands	Size Range	Number of bands	Size Range	Number of bands	Size Range	Number of bands	Size Range	Number of bands	Size Range	Number of bands	Size Range	Number of bands	Size Range	Number of bands	Size Range	Number of bands	Size Range	Number of bands	Size Range
German Shepherd	22	342	380-1450	315	350-1450	391	370-1450	145	450-1330	252	250-1350	304	270-1450	333	340-1400	299	280-1350	170	400-1280	349	370-1450
Welsh Corgi	3	38	300-1450	38	330-1450	42	500-1450	28	350-1100	45	350-1450	34	450-1210	34	400-1450	38	220-1350	23	350-1090	44	380-1450
Border Collie	1	0	0	11	370-1260	11	580-1500	6	430-750	10	370-1190	0	0	0	0	10	340-1220	8	580-1100	0	0
Miniature Pinscher	6	98	340-1350	85	260-1180	93	390-1400	66	350-1350	96	280-1250	84	380-1280	88	380-1350	101	330-1350	81	390-1350	74	290-1350
Schnauzer	6	90	340-1350	84	280-1180	88	390-1400	47	350-1350	87	280-1250	67	450-1300	90	380-1350	90	330-1350	89	390-1350	66	340-1350
Bulldog	5	62	340-1270	69	260-1350	69	390-1350	43	400-1280	59	280-1130	61	450-1220	67	380-1350	78	330-1350	65	390-1350	50	360-1350
Rottweiler	5	73	340-1300	61	260-1110	81	400-1400	55	400-1350	79	280-1230	57	450-1280	78	380-1350	84	330-1350	66	390-1350	55	400-1350
Doberman Pinscher	3	44	380-1400	49	370-1450	42	480-1450	39	280-1300	44	350-1450	39	500-1250	43	350-1400	50	280-1350	25	380-1050	47	400-1450
Dogo Argentino	1	9	320-1090	8	480-1150	14	580-1500	7	430-850	7	450-1190	12	490-1270	17	320-1380	15	340-1500	7	580-1000	6	650-1150
Fila Brasileiro	1	13	390-1350	9	370-1260	12	580-1500	7	430-850	7	370-1000	13	440-1330	17	500-1500	19	370-1500	6	480-900	11	810-1400
Great Dane	1	7	600-1090	7	480-1150	13	580-1500	7	430-850	7	450-1190	12	490-1270	13	500-1500	16	340-1400	6	580-1080	9	520-1220
Yorkshire Terrier	16	202	370-1500	205	300-1350	177	250-1450	148	310-1350	220	320-1450	209	360-1450	231	320-1350	187	270-1350	165	370-1350	227	250-1450
Jack Russell Terrier	10	140	340-1350	135	290-1350	150	400-1400	83	420-1350	128	280-1250	98	340-1280	118	380-1350	132	330-1350	109	390-1350	100	310-1350
Bull Terrier	4	69	340-1350	38	370-1350	49	490-1400	53	420-1350	69	280-1230	54	340-1220	63	420-1350	74	330-1350	59	390-1350	56	310-1350
West Highland White Terrier	2	28	400-1210	32	450-1450	22	570-1450	16	400-1050	36	350-1310	19	550-1210	27	350-1450	27	300-1220	14	450-1010	30	400-1450
Dachshund	3	36	380-1450	31	330-1450	37	570-1450	32	440-1350	40	350-1500	33	580-1450	42	360-1450	48	380-1450	27	400-1200	40	350-1300
Pomeranian	47	636	290-1500	615	285-1600	762	280-1500	382	380-1450	666	190-1500	478	350-1400	731	300-1450	664	260-1370	385	330-1350	982	230-1300
Siberian Husky	31	377	370-1500	421	240-1450	344	250-1450	303	310-1350	487	250-1450	392	330-1450	460	350-1350	399	270-1350	376	370-1350	424	250-1450
Thai Bangkaew	18	247	320-1350	257	350-1300	258	350-1400	171	350-1380	221	350-1250	247	280-1350	273	320-1350	298	250-1350	142	400-1260	295	220-1350
Samoyed	6	75	340-1300	79	310-1200	96	400-1400	47	400-1350	76	280-1230	59	450-1220	78	380-1350	76	330-1350	72	390-1350	50	390-1250
Spitz	6	64	350-1300	72	330-1500	93	340-1450	71	440-1450	88	310-1390	75	320-1500	82	370-1450	88	340-1400	67	400-1090	71	360-1320
Chow Chow	3	42	350-1450	43	380-1450	39	500-1400	28	480-1240	51	350-1450	35	550-1350	33	500-1450	53	380-1450	22	500-1100	41	380-1380
Thai Ridgeback	3	43	380-1450	43	290-1450	41	450-1450	37	280-1350	50	350-1500	35	500-1450	46	350-1450	50	380-1450	25	450-1320	48	320-1450
Alaskan Malamute	2	33	350-1450	22	480-1450	29	480-1450	11	650-1120	29	350-1500	23	580-1450	28	520-1400	28	380-1450	23	500-1250	31	410-1450
Akita Inu	1	8	320-1090	6	370-1260	12	580-1500	7	430-850	6	650-1190	12	490-1210	13	500-1500	18	370-1500	6	580-1000	4	810-1150
Shiba Inu	1	13	550-1350	17	350-1300	15	490-1300	12	420-1380	15	350-1250	12	500-1350	17	500-1350	20	380-1230	9	520-1220	14	420-1320
Beagle	28	338	320-1450	340	240-1270	360	350-1400	196	330-1380	313	350-1300	362	280-1350	432	320-1350	401	280-1350	300	350-1260	458	200-1350
Dalmatian	3	50	270-1450	37	290-1450	49	450-1450	28	330-1350	49	350-1500	34	450-1450	47	360-1450	49	380-1450	29	400-1200	47	380-1380
Golden Retriever	40	389	400-1450	387	290-1500	568	340-1450	297	400-1450	443	240-1390	429	320-1500	598	300-1450	529	190-1400	359	330-1220	456	360-1490
Labrador Retriever	14	191	380-1390	203	390-1450	270	370-1450	93	450-1330	159	180-1350	202	320-1450	194	290-1400	186	280-1350	109	360-1250	283	220-1450
Cocker Spaniel	5	52	380-1450	70	370-1450	75	550-1450	63	400-1350	94	350-1500	55	600-1450	76	480-1450	97	300-1450	37	400-1250	74	350-1450
Chihuahua	46	481	310-1200	670	280-1100	324	280-1210	289	510-1700	458	360-1700	397	390-1600	542	330-1600	387	220-1380	409	210-1350	534	270-1500
Shih Tzu	37	300	380-1350	442	280-1320	483	390-1350	311	390-1330	497	290-1350	406	290-1350	396	340-1340	397	320-1350	331	400-1350	422	260-1400
French Bulldog	29	405	350-1450	229	380-1450	417	320-1350	206	520-1360	376	300-1350	353	380-1360	390	360-1450	374	230-1450	320	320-1450	463	380-1450
Poodle	17	255	350-1320	116	380-1280	220	320-1350	127	520-1360	224	300-1350	230	380-1360	230	360-1450	243	230-1450	172	400-1450	200	380-1450
Pug	11	146	380-1320	109	390-1250	163	390-1450	92	450-1250	131	270-1220	149	350-1450	128	350-1400	133	330-1350	94	400-1250	132	370-1450
Bichon Frise	3	40	380-1450	39	390-1450	39	570-1450	24	400-1240	46	350-1380	28	550-1450	43	350-1450	44	300-1350	18	530-1090	41	400-1450
Boston Terrier	3	37	380-1210	32	380-1450	35	500-1450	30	380-1300	42	350-1500	37	450-1300	35	350-1450	37	300-1220	29	380-1280	45	400-1450
Pekingese	3	46	300-1450	38	380-1390	35	570-1450	25	400-1100	42	390-1450	42	500-1300	45	380-1450	46	280-1220	21	400-1050	50	400-1450
Cavalier King Charles Spaniel	2	31	270-1300	28	450-1450	25	500-1450	16	400-1000	31	390-1450	27	400-1210	30	400-1450	30	260-1220	14	500-950	30	400-1450
Papillon	1	6	980-1350	10	370-1220	12	390-1350	8	560-1280	10	400-900	11	440-1100	12	600-1300	12	400-1240	6	450-1000	10	680-1400
American Bully	9	60	380-1350	87	320-1220	125	390-1350	65	470-1330	107	330-1350	99	440-1350	90	340-1340	103	350-1350	75	400-1350	106	370-1400
American Pit Bull Terrier	5	68	340-1300	71	250-1090	68	390-1400	50	400-1350	59	280-1170	52	450-1280	66	380-1350	68	330-1350	65	390-1350	47	360-1350
Total	463	5684	270-1500	5660	240-1600	6248	250-1500	3771	280-1450	5956	180-1700	5377	270-1600	6376	320-1600	6098	220-1500	4435	210-1450	6522	200-1490

## Sheet: Sheet1
Table supplement 2			Pairwise population matrix of Nei’s Genetic Distance are below the diagonal and Pairwise population Fst values, above the diagonal, in overall population of different dog breeds
CHI	DACH	DAL	JACK	PUG	LAB	GER	BK	BEA	BULLY	YORK	HUS	FRE	POOD	SPI	TRB	CHOW	COR	PEK	DOB	BOS	BIC	COCK	BULL	PIT	ROTT	BULLD	MINI	SCH	SAM	POM	SHIH	GOLD
0	0.0525626	0.048747	0.0186759	0.0207424	0.0176905	0.017666	0.0161259	0.0145652	0.0205464	0.0152669	0.0152377	0.0158403	0.0161568	0.0283189	0.0520096	0.0488725	0.0513624	0.0518373	0.0523802	0.049953	0.0492507	0.031839	0.0431537	0.0319424	0.0303517	0.0327179	0.0262531	0.0254722	0.026023	0.0152814	0.0160581	0.016155	CHI
2.17668	0	0.0753497	0.0516797	0.0521023	0.0489684	0.0483157	0.0497303	0.0480955	0.0551212	0.0443838	0.0449527	0.0468313	0.0458466	0.0614701	0.0737721	0.0680422	0.0781448	0.0723735	0.069622	0.0723692	0.0623146	0.0484577	0.0699994	0.0604769	0.0630174	0.0664093	0.0575381	0.056799	0.0591182	0.0463949	0.0481817	0.0489941	DACH
1.64296	1.69645	0	0.0499857	0.0509049	0.0453149	0.0477354	0.0483404	0.0478152	0.0527266	0.0438327	0.045899	0.0464197	0.0466018	0.0600673	0.0767462	0.0711101	0.0753039	0.072463	0.0753497	0.0794997	0.0768357	0.0570851	0.0722169	0.0621657	0.0613291	0.063854	0.0546995	0.0568312	0.0589885	0.0460096	0.0473734	0.0480315	DAL
1.10459	1.9153	1.70399	0	0.0195614	0.0171172	0.016398	0.0166004	0.0151227	0.021015	0.0153544	0.0149016	0.0158536	0.0158605	0.0310963	0.0512669	0.0512595	0.0495422	0.0507856	0.0525215	0.0495681	0.051665	0.032331	0.0319453	0.0221057	0.0221148	0.0223651	0.0170615	0.0159742	0.0162444	0.01523	0.0161848	0.0183888	JACK
1.31047	1.91654	1.76994	1.09631	0	0.00833424	0.00595929	0.0167431	0.0156523	0.0216373	0.0167827	0.0163582	0.0148601	0.0152283	0.0311382	0.0501842	0.0490457	0.0497911	0.0505587	0.0521038	0.049399	0.0505762	0.0322621	0.0409225	0.0318046	0.0313463	0.0320261	0.0272991	0.0273057	0.0276681	0.0169157	0.0166086	0.0165666	PUG
1.22251	1.84349	1.42364	1.06881	0.365729	0	0.00542791	0.0143344	0.0136789	0.0196721	0.0134377	0.0136236	0.0126942	0.0128069	0.0272078	0.0468546	0.0483564	0.0474443	0.0489478	0.0510571	0.0465377	0.0477553	0.0294808	0.0371212	0.0280337	0.0285796	0.0289457	0.0244162	0.0251679	0.0251697	0.0134398	0.0138811	0.0147041	LAB
1.20944	1.74598	1.67366	0.983076	0.243069	0.262715	0	0.0139997	0.0127471	0.0186626	0.0128756	0.012594	0.0117539	0.0122512	0.0273064	0.046005	0.0467792	0.0485057	0.0479121	0.0498517	0.0460046	0.0461728	0.0280368	0.0370114	0.0288598	0.0288631	0.0295556	0.024626	0.0249127	0.0259059	0.0128057	0.0131843	0.014622	GER
1.01497	1.9414	1.74073	1.00105	0.979991	0.951393	0.907863	0	0.00484445	0.0169524	0.0124141	0.0121846	0.0125762	0.0121318	0.026677	0.0478631	0.0464433	0.0488099	0.0480923	0.0480949	0.0476381	0.0490397	0.0293573	0.038566	0.0292182	0.0286575	0.0283741	0.0233593	0.0234777	0.0241699	0.0122587	0.0127724	0.014523	BK
0.917101	1.82403	1.78054	0.91422	0.933498	0.954653	0.844333	0.239791	0	0.0162858	0.0109232	0.0107462	0.0113004	0.0115239	0.0259497	0.0470604	0.0449256	0.0463015	0.0462945	0.0476577	0.0454099	0.0478083	0.0285258	0.036939	0.0288868	0.0279872	0.0278049	0.0224776	0.0220239	0.0224286	0.012045	0.0112145	0.0133283	BEA
1.24831	2.37081	1.95704	1.22698	1.25798	1.30954	1.16775	0.974063	0.970639	0	0.0160353	0.0161425	0.0163772	0.0168827	0.0308532	0.0520669	0.0512578	0.0516773	0.0525438	0.0520849	0.0522397	0.0530867	0.0345319	0.040886	0.0321672	0.0328241	0.0316051	0.0285141	0.027764	0.0280367	0.0165641	0.00780307	0.018347	BULLY
1.06315	1.44157	1.3875	0.997126	1.12829	0.997079	0.918864	0.859712	0.768424	1.00272	0	0.00294791	0.0109366	0.0113048	0.0263359	0.0446326	0.0454428	0.0454342	0.0443809	0.0454427	0.0446586	0.0464929	0.026978	0.036574	0.0279298	0.0266675	0.0276196	0.0218684	0.0227908	0.0235289	0.0116676	0.0114358	0.0138044	YORK
1.07593	1.51679	1.63262	0.959202	1.09045	1.03886	0.900292	0.847301	0.76155	1.0283	0.165473	0	0.0117886	0.0123323	0.0254063	0.0446688	0.0472681	0.0450753	0.0456159	0.0459051	0.04468	0.045344	0.0271361	0.0362419	0.0281172	0.0265638	0.0280402	0.0216915	0.0229219	0.0233915	0.0111745	0.0110833	0.0132741	HUS
1.13129	1.73284	1.67342	1.04818	0.897344	0.897288	0.787499	0.87231	0.804599	1.03372	0.824321	0.947907	0	0.00383175	0.0267635	0.0453283	0.0453208	0.0467597	0.0469688	0.0464281	0.0448496	0.0454403	0.0288736	0.0352578	0.0276228	0.0265272	0.0278918	0.0234443	0.024993	0.0246806	0.0119816	0.0117412	0.0137851	FRE
1.16138	1.59019	1.68438	1.03878	0.927856	0.900575	0.831759	0.814918	0.819978	1.08419	0.858822	1.01105	0.214052	0	0.0265168	0.0450624	0.0440556	0.0462699	0.0454518	0.0458163	0.0443867	0.0452616	0.0272369	0.0349642	0.0275695	0.0267973	0.0278016	0.0235636	0.024339	0.0239254	0.0117523	0.0128531	0.0138141	POOD
1.54864	2.36974	2.1466	1.88447	1.81462	1.59616	1.60004	1.49773	1.50819	1.71404	1.69105	1.55318	1.75935	1.68915	0	0.0586635	0.0607743	0.0550955	0.0614705	0.0628631	0.0607307	0.0579145	0.0404332	0.0509663	0.0421216	0.0429753	0.0425394	0.0375716	0.0382645	0.0397231	0.0248904	0.026657	0.0170407	SPI
2.07916	1.60944	1.79176	1.85814	1.68293	1.57779	1.48361	1.68189	1.67945	1.87003	1.46974	1.48602	1.53832	1.49825	1.96428	0	0.0796329	0.0754371	0.0796766	0.0738616	0.073949	0.0695283	0.0501599	0.0732624	0.0638844	0.0630174	0.0655423	0.056103	0.0568419	0.0577153	0.0471109	0.0476105	0.0477333	TRB
1.65352	1.32176	1.45529	1.85814	1.56515	1.76011	1.56365	1.52366	1.44104	1.76923	1.55936	1.82553	1.53832	1.3945	2.25196	2.0149	0	0.0666916	0.0724172	0.0738595	0.0839161	0.0738595	0.0544986	0.0743094	0.0638692	0.0638231	0.0646905	0.0582132	0.0575489	0.0598358	0.0447729	0.0461197	0.0484502	CHOW
1.97462	1.89712	1.69645	1.65747	1.64211	1.64678	1.77129	1.80325	1.58764	1.81836	1.55936	1.53254	1.717	1.64039	1.61597	1.69645	1.26113	0	0.0724609	0.0782343	0.0678612	0.0680902	0.055366	0.0764274	0.0621809	0.0646901	0.0604461	0.0532078	0.0574743	0.0562686	0.0450402	0.0479514	0.0470864	COR
2.05122	1.5294	1.5294	1.80407	1.72549	1.84349	1.69719	1.71087	1.58764	1.93255	1.44157	1.59814	1.74714	1.54214	2.36974	2.0149	1.5294	1.5294	0	0.0651555	0.0739053	0.0725524	0.0570543	0.0753804	0.0646749	0.062971	0.0646749	0.0582237	0.0567778	0.0581957	0.0473687	0.0492089	0.0486641	PEK
2.14298	1.38629	1.69645	2.04046	1.91654	2.2064	1.96912	1.71087	1.75949	1.87003	1.55936	1.63262	1.67258	1.583	2.65742	1.60944	1.60944	1.89712	1.20397	0	0.0753934	0.0738616	0.05442	0.0732383	0.0638231	0.0680672	0.0647057	0.0575381	0.0575489	0.06124	0.047731	0.0490905	0.0507907	DOB
1.78219	1.5294	2.0149	1.65747	1.60289	1.545	1.48361	1.65371	1.48756	1.89302	1.46974	1.48602	1.48429	1.42623	2.25196	1.60944	2.48491	1.32176	1.60944	1.69645	0	0.073951	0.0570391	0.073288	0.0621809	0.0630018	0.0630326	0.054699	0.0575593	0.0545696	0.0459376	0.0461225	0.0481571	BOS
1.69687	1.09861	1.79176	1.9153	1.72549	1.68315	1.50303	1.83604	1.78054	2.0079	1.69289	1.5648	1.55082	1.5217	1.88423	1.38629	1.60944	1.32176	1.5294	1.60944	1.60944	0	0.0431726	0.0743094	0.0663632	0.0655423	0.0638384	0.0589312	0.0561349	0.0596851	0.0460382	0.0478365	0.0468718	BIC
1.55368	1.05392	1.51654	1.53819	1.47881	1.42774	1.25945	1.3983	1.38629	1.73013	1.27317	1.30611	1.50678	1.28622	1.76016	1.13088	1.35403	1.40532	1.51654	1.35403	1.51654	0.85325	0	0.052906	0.042471	0.0475976	0.046045	0.0387263	0.0383241	0.0399289	0.0277349	0.0291942	0.0300982	COCK
2.314	2.05331	2.30462	0.972873	1.72133	1.55166	1.5306	1.72986	1.61249	1.67791	1.65492	1.62717	1.46917	1.42322	2.30279	2.45877	2.64109	3.15192	2.86424	2.45877	2.45877	2.64109	2.02104	0	0.0426977	0.0394423	0.044595	0.037788	0.0399543	0.0415541	0.0368637	0.0363717	0.0379606	BULL
1.56529	1.78481	1.95186	0.727258	1.42752	1.26411	1.34646	1.38177	1.43176	1.43609	1.38868	1.43128	1.34095	1.32345	1.99655	2.15253	2.15253	1.95186	2.27032	2.15253	1.95186	2.558	1.60944	1.17374	0	0.0296142	0.0327307	0.0306709	0.0280641	0.0271583	0.0273025	0.0274053	0.0303468	PIT
1.37813	2.04717	1.86485	0.727258	1.37873	1.32238	1.34646	1.31826	1.32176	1.51108	1.23745	1.23974	1.21582	1.23728	2.13965	2.04717	2.15253	2.27032	2.04717	2.96346	2.04717	2.40385	2.30259	1.00944	0.798508	0	0.0306552	0.029331	0.025909	0.0298598	0.0272527	0.0292587	0.0291433	ROTT
1.67229	2.558	2.15253	0.741244	1.45283	1.3632	1.42759	1.28795	1.30114	1.37703	1.34868	1.42023	1.374	1.35194	2.06554	2.40385	2.27032	1.78481	2.27032	2.27032	2.04717	2.15253	2.04022	1.28707	0.941609	0.84397	0	0.0297788	0.0267546	0.028008	0.0276817	0.0289188	0.0308557	BULLD
1.32942	1.87597	1.6077	0.606448	1.33636	1.26512	1.28162	1.14116	1.11745	1.43992	1.10898	1.10227	1.28348	1.28807	1.90538	1.73287	1.95601	1.49648	1.95601	1.87597	1.6077	2.04302	1.60529	1.07074	0.982759	0.912141	0.935131	0	0.0214872	0.0246146	0.0224023	0.0237662	0.0259944	MINI
1.24471	1.80186	1.80186	0.55179	1.33636	1.35527	1.31552	1.15299	1.07199	1.3564	1.21278	1.24312	1.50134	1.39	2.02317	1.80186	1.87597	1.87597	1.80186	1.87597	1.87597	1.73287	1.56084	1.19591	0.846183	0.745087	0.784308	0.660357	0	0.0216603	0.0234013	0.0244576	0.0256748	SCH
1.23614	1.97402	1.95749	0.542511	1.30557	1.27625	1.35443	1.15916	1.05077	1.31469	1.22146	1.21997	1.35637	1.25011	2.16052	1.81987	2.06103	1.68633	1.87871	2.2617	1.54657	2.04301	1.66034	1.2617	0.782511	0.912128	0.822516	0.787314	0.649744	0	0.0235488	0.0242449	0.0268398	SAM
1.08965	1.70526	1.65647	1.00166	1.17035	1.02129	0.931027	0.860279	0.917999	1.08472	0.9473	0.898978	0.981262	0.937323	1.47928	1.81062	1.50232	1.53341	1.85318	1.9129	1.64464	1.65647	1.38688	1.73262	1.33207	1.32542	1.37986	1.18684	1.3099	1.24457	0	0.012193	0.0139643	POM
1.07962	1.82054	1.7102	1.01998	1.02904	0.970587	0.883788	0.835202	0.740713	0.336956	0.817357	0.790579	0.845335	0.969998	1.60629	1.7405	1.55818	1.78775	1.98306	1.96365	1.55818	1.77175	1.46077	1.52778	1.25032	1.46982	1.42537	1.25083	1.33421	1.22961	0.927759	0	0.0137363	SHIH
1.12473	2.00136	1.84487	1.35314	1.05104	1.1103	1.08952	1.06923	1.00828	1.24171	1.17214	1.11013	1.15728	1.146	0.666663	1.7985	1.91054	1.70887	1.94552	2.38984	1.86236	1.68361	1.63204	1.79616	1.67318	1.49059	1.76122	1.59872	1.54627	1.62153	1.23371	1.05325	0	GOLD
CHI= Chihuahua
DACH= Dachshund
DAL= Dalmatian
JACK= Jack Russell Terrier
PUG= Pug
LAB= Labrador Retriever
GER= German Shepherd
BK= Thai Bangkaew
BEA= Beagle
BULLY= American Bully
YORK= Yorkshire Terrier
HUS= Siberian Husky
FRE= French Bulldog
POOD= Poodle
SPI= Spitz
TRB= Thai Ridge back
CHOW= Chow Chow
COR= Welsh Corgi
PEK= Pekingese
DOB= Doberman Pinscher
BOS= Boston Terrier
BIC= Bichon Frise
COCK= Cocker Spaniels
BULL= Bull Terrier
PIT= American Pit Bull Terrier
ROTT= Rottweiler
BULLD= Bulldog
MINI= Miniature Pinscher
SCH= Schnauzer
SAM= Samoyed
POM= Pomeranian
SHIH= Shih Tzu
GOLD= Golden Retriever
